# Supplementary material
Source: Research Square preprint supplement (doi:10.21203/rs.3.rs-9460018/v1)
Supplement: Supplementary file 1 [file 16e6122ac01ed448415632c1.xlsx]

## Sheet: Socioeconomic
Sex of respondents	Sex of respondents2	Age (years)	Main age	Household Head	Household Head2	Marital status	Marital 2	Level of education
Female	1	18-25	51	Male	1	Married	2	Junior High School
Female	1	18-25	61	Male	1	Married	2	Primary School
Female	1	26-35	61	Male	1	Married	2	Primary School
Female	1	26-35	41	Male	1	Married	2	Primary School
Female	1	26-35	31	Male	1	Married	2	Primary School
Female	1	36-45	66	Male	1	Married	2	Not applicable
Female	1	26-35	31	Male	1	Married	2	Not applicable
Female	1	36-45	61	Male	1	Married	2	Not applicable
Female	1	36-45	41	Male	1	Married	2	Not applicable
Male	0	46-55	31	Male	1	Married	2	Primary School
Male	0	36-45	31	Male	1	Married	2	Not applicable
Male	0	18-25	41	Male	1	Married	2	Not applicable
Male	0	56-65	51	Male	1	Married	2	University
Male	0	65+	31	Male	1	Married	2	Not applicable
Male	0	26-35	51	Male	1	Married	2	Not applicable
Male	0	36-45	22	Male	1	Married	2	Not applicable
Male	0	26-35	41	Male	1	Married	2	Not applicable
Male	0	18-25	31	Male	1	Married	2	Not applicable
Male	0	26-35	51	Male	1	Married	2	Not applicable
Male	0	36-45	31	Male	1	Married	2	Not applicable
Male	0	36-45	41	Male	1	Married	2	Not applicable
Male	0	65+	51	Male	1	Married	2	Not applicable
Male	0	46-55	41	Male	1	Married	2	Not applicable
Male	0	36-45	67	Male	1	Married	2	Not applicable
Male	1	46-55	68	Male	1	Married	2	Not applicable
Female	1	26-35	31	Male	1	Married	2	Not applicable
Female	1	46-55	41	Male	1	Married	2	Primary School
Male	0	46-55	41	Male	1	Married	2	Not applicable
Male	0	18-25	67	Male	1	Single	1	Junior High School
Male	0	18-25	41	Male	1	Married	2	Primary School
Male	0	36-45	68	Male	1	Married	2	Not applicable
Male	0	65+	31	Male	1	Married	2	University
Male	0	65+	41	Male	1	Married	2	Not applicable
Male	1	18-25	31	Male	1	Single	1	Not applicable
Male	0	26-35	31	Male	1	Married	2	Not applicable
Male	0	36-45	31	Male	1	Married	2	Junior High School
Male	0	65+	41	Male	1	Married	2	Not applicable
Male	0	36-45	41	Male	1	Married	2	Not applicable
Male	0	26-35	61	Male	1	Married	2	Junior High School
Male	0	26-35	68	Male	1	Married	2	Not applicable
Male	1	36-45	68	Male	1	Married	2	Not applicable
Male	1	65+	31	Male	1	Married	2	Not applicable
Male	1	26-35	51	Male	1	Married	2	Primary School
Female	1	26-35	41	Male	1	Married	2	Junior High School
Female	1	36-45	67	Male	1	Married	2	Primary School
Female	1	26-35	18	Male	1	Married	2	Not applicable
Female	1	26-35	41	Male	1	Married	2	Not applicable
Female	1	36-45	21	Male	1	Married	2	Not applicable
Female	1	65+	51	Male	1	Married	2	Primary School
Male	0	56-65	31	Male	1	Married	2	Not applicable
Male	0	18-25	31	Male	1	Married	2	Junior High School
Male	0	36-45	31	Male	1	Married	2	Not applicable
Male	0	46-55	31	Male	1	Married	2	Junior High School
Male	0	18-25	61	Female	2	Married	2	Junior High School
Male	0	26-35	41	Male	1	Married	2	Not applicable
Male	0	26-35	41	Male	1	Married	2	Primary School
Male	0	46-55	41	Male	1	Married	2	University
Male	0	26-35	21	Male	1	Single	1	Primary School
Male	0	36-45	67	Male	1	Married	2	Primary School
Male	0	26-35	41	Male	1	Married	2	Not applicable
Male	0	36-45	31	Male	1	Married	2	Primary School
Male	0	65+	41	Male	1	Married	2	Not applicable
Male	1	36-45	51	Male	1	Single	1	Junior High School
Male	1	36-45	31	Male	1	Married	2	Primary School
Male	0	26-35	61	Male	1	Married	2	Not applicable
Female	1	46-55	41	Female	2	Married	2	Not applicable
Female	1	26-35	51	Male	1	Married	2	Primary School
Female	1	36-45	31	Male	1	Married	2	Not applicable
Male	0	26-35	68	Male	1	Married	2	Not applicable
Male	0	18-25	67	Male	1	Married	2	Not applicable
Male	0	36-45	21	Male	1	Married	2	Primary School
Male	0	46-55	21	Male	1	Married	2	Technical/Vocational/Professional
Male	0	56-65	31	Male	1	Married	2	Not applicable
Male	0	26-35	68	Male	1	Single	1	University
Male	0	26-35	41	Male	1	Married	2	Not applicable
Male	0	36-45	21	Male	1	Married	2	Junior High School
Male	0	26-35	67	Male	1	Married	2	University
Male	0	26-35	51	Male	1	Married	2	Primary School
Male	0	18-25	61	Male	1	Married	2	Not applicable
Male	0	36-45	51	Male	1	Married	2	Not applicable
Male	1	36-45	31	Male	1	Married	2	Not applicable
Male	1	46-55	31	Male	1	Married	2	Junior High School
Male	1	18-25	51	Male	1	Single	1	Junior High School
Male	1	36-45	67	Male	1	Married	2	Junior High School
Female	1	56-65	21	Male	1	Married	2	Not applicable
Female	1	26-35	41	Male	1	Married	2	Junior High School
Female	1	36-45	41	Male	1	Married	2	Not applicable
Female	1	65+	67	Male	1	Married	2	Not applicable
Female	1	46-55	21	Male	1	Married	2	Not applicable
Female	1	46-55	41	Male	1	Married	2	Not applicable
Female	1	56-65	51	Male	1	Married	2	Not applicable
Female	1	56-65	51	Male	1	Married	2	Not applicable
Female	1	65+	41	Male	1	Married	2	Not applicable
Female	1	36-45	21	Male	1	Married	2	Junior High School
Female	1	36-45	31	Male	1	Married	2	Junior High School
Male	0	36-45	51	Male	1	Married	2	Junior High School
Male	0	65+	51	Male	1	Married	2	Not applicable
Male	0	46-55	41	Male	1	Married	2	Not applicable
Male	0	26-35	21	Male	1	Married	2	Primary School
Male	0	36-45	41	Male	1	Married	2	Primary School
Male	0	36-45	41	Male	1	Married	2	Not applicable
Male	0	65+	67	Male	1	Married	2	Not applicable
Male	0	26-35	31	Male	1	Married	2	Senior High School
Male	0	36-45	41	Male	1	Married	2	Senior High School
Male	0	46-55	51	Male	1	Married	2	Primary School
Male	0	36-45	41	Male	1	Married	2	Not applicable
Male	0	36-45	41	Male	1	Married	2	Not applicable
Male	0	46-55	51	Male	1	Married	2	Primary School
Male	0	65+	67	Male	1	Married	2	Not applicable
Male	0	46-55	51	Male	1	Married	2	Primary School
Male	0	56-65	61	Male	1	Married	2	Not applicable
Male	0	46-55	51	Male	1	Married	2	Not applicable
Male	0	36-45	41	Male	1	Married	2	Not applicable
Male	0	56-65	61	Male	1	Married	2	Primary School
Male	0	36-45	41	Male	1	Married	2	Primary School
Male	0	46-55	51	Male	1	Married	2	Junior High School
Male	0	36-45	41	Male	1	Divorce	2	Not applicable
Male	0	46-55	51	Male	1	Married	2	Not applicable
Male	0	56-65	61	Male	1	Married	2	Junior High School
Male	0	36-45	41	Male	1	Married	2	Not applicable
Male	0	46-55	51	Male	1	Married	2	Primary School
Male	0	46-55	51	Male	1	Married	2	Not applicable
Male	0	65+	67	Male	1	Married	2	Not applicable
Male	0	26-35	31	Male	1	Married	2	Primary School
Male	0	46-55	51	Male	1	Married	2	Not applicable
Male	0	46-55	51	Male	1	Married	2	Primary School
Male	1	46-55	51	Male	1	Married	2	Junior High School
Male	1	56-65	61	Male	1	Married	2	Primary School
Male	1	46-55	51	Male	1	Married	2	Not applicable
Male	1	46-55	51	Male	1	Married	2	Junior High School
Male	1	46-55	51	Male	1	Married	2	Primary School
Male	1	56-65	61	Male	1	Married	2	Not applicable
Male	1	65+	67	Male	1	Married	2	Primary School
Male	1	46-55	51	Male	1	Divorce	2	Junior High School
Male	1	46-55	51	Male	1	Married	2	Senior High School
Male	1	65+	68	Male	1	Married	2	Not applicable
Male	1	65+	68	Male	1	Married	2	Not applicable
Male	1	36-45	41	Male	1	Married	2	Not applicable
Male	1	18-25	22	Male	1	Single	1	Not applicable
Male	1	26-35	31	Male	1	Married	2	Technical/Vocational/Professional
Male	1	65+	69	Male	1	Married	2	Not applicable
Male	1	46-55	51	Male	1	Married	2	Not applicable

## Sheet: Main Objective 
The tables below represent datasets of female and male farmers. Male farmers dataset is below in this worksheet
Female Farmers/Women/Wives
Practising CSAT	CSAT knowledge level	Decision maker of CSAT adoption	Decisions to plant/rear livestock	Source of finance	Source of CSAT information	Ever receive extension training	Receiver of extension training	CSAT opportunities of female/wives/women farmers	CSAT adoption barriers for female/wives/women farmers
No	High	Husband and wife	Husband	Co-operatives fund	Family members/Friends/neighbours	No			Inadequate access to credit
No	Low	Husband and wife	Husband	Co-operatives fund	Family members/Friends/neighbours	No			Inadequate access to credit
No	Low	Husband and wife	Husband	Co-operatives fund	Family members/Friends/neighbours	No			Inadequate access to credit
No	Low	Husband and wife	Husband	Family	Family members/Friends/neighbours	No			Inadequate access to credit
No	Low	Husband and wife	Husband	Family	Family members/Friends/neighbours	No			Inadequate access to credit
No	Low	Husband and wife	Husband	Family	Family members/Friends/neighbours	No			Inadequate access to credit
No idea	Low	Husband and wife	Husband	Family	Family members/Friends/neighbours	No		Access to capital	Inadequate access to credit
No idea	Low	Husband and wife	Husband	Family	Family members/Friends/neighbours	No		Access to capital	Inadequate access to credit
Yes	Satisfactory	Husband and wife	Husband	Family	Family members/Friends/neighbours	No		Access to capital	Inadequate CSAT information
Yes	Satisfactory	Husband and wife	Husband	Family	Family members/Friends/neighbours	No		Access to capital	Inadequate CSAT information
Yes	Satisfactory	Husband and wife	Husband	NGO	Family members/Friends/neighbours	No		Access to capital	Inadequate CSAT information
Yes	Satisfactory	Husband and wife	Husband and wife	NGO	Family members/Friends/neighbours	No		Access to capital	Inadequate CSAT information
Yes	Satisfactory	Husband and wife	Husband and wife	NGO	Family members/Friends/neighbours	No		Access to capital	Inadequate CSAT information
Yes	Satisfactory	Only Man/husband	Husband and wife	NGO	Family members/Friends/neighbours	No		Access to capital	Inadequate CSAT information
Yes	Satisfactory	Only Man/husband	Husband and wife	Self-capital	Family members/Friends/neighbours	No		Access to capital	Inadequate CSAT information
Yes	Satisfactory	Only Man/husband	Husband and wife	Self-capital	Family members/Friends/neighbours	No		Access to capital	Inadequate CSAT information
Yes	Satisfactory	Only Man/husband	Husband and wife	Self-capital	Family members/Friends/neighbours	No		Access to capital	Inadequate CSAT information
Yes	Satisfactory	Only Man/husband	Husband and wife	Self-capital	Family members/Friends/neighbours	No		Access to capital	Inadequate CSAT information
Yes	Satisfactory	Only Man/husband	Husband and wife	Self-capital	Family members/Friends/neighbours	No		Access to capital	Inadequate CSAT information
Yes	Satisfactory	Only Man/husband	Husband and wife	Self-capital	Family members/Friends/neighbours	No		Access to capital	Inadequate CSAT information
Yes	Satisfactory	Only Man/husband	Husband and wife	Self-capital	Family members/Friends/neighbours	No idea		Access to capital	Inadequate CSAT information
Yes	Satisfactory	Only Man/husband	Husband and wife	Self-capital	Family members/Friends/neighbours	No idea		Access to capital	Inadequate CSAT information
Yes	Satisfactory	Only Man/husband	Husband and wife	Self-capital	Family members/Friends/neighbours	Yes	Husband	Access to capital	Inadequate CSAT information
Yes	Satisfactory	Only Man/husband	Husband and wife	Self-capital	Family members/Friends/neighbours	Yes	Husband	Access to capital	Inadequate CSAT information
Yes	Satisfactory	Only Man/husband	Husband and wife	Self-capital	Family members/Friends/neighbours	Yes	Husband and wife	Access to capital	Inadequate CSAT information
Yes	Satisfactory	Only Man/husband	Husband and wife	Self-capital	Farmer’s co-operatives	Yes	Wife	Access to capital	Inadequate skill training
Yes	Satisfactory	Only Man/husband	Wife	Self-capital	Farmer’s co-operatives	Yes	Wife	Access to capital	Inadequate skill training
Yes	Satisfactory	Only Woman/wife	Wife	Self-capital	Farmer’s co-operatives	Yes	Wife	Access to input market	Inadequate skill training
Yes	Satisfactory	Only Woman/wife	Wife	Self-capital	Personal experiences	Yes	Wife	Access to input market	Inadequate skill training
Yes	Satisfactory	Only Woman/wife	Wife	Self-capital	Personal experiences	Yes	Wife	Access to input market	Inadequate skill training
Yes	Satisfactory	Only Woman/wife	Wife	Self-capital	Personal experiences	Yes	Wife	Access to input market	Inadequate skill training
Yes	Satisfactory	Only Woman/wife	Wife	Self-capital	Personal experiences	Yes	Wife	Access to input market	Inadequate skill training
Yes	Very low	Only Woman/wife	Wife	Self-capital	Personal experiences	Yes	Wife	Access to input market	Inadequate skill training
					Personal experiences			Access to input market	Inadequate skill training
					Personal experiences			Access to input market	Inadequate skill training
					Personal experiences			Access to input market	Inadequate skill training
					Personal experiences			Subsidies	Inadequate skill training
					Personal experiences			Subsidies	Inadequate skill training
					Personal experiences			Subsidies	Inadequate skill training
					Personal experiences			Subsidies	Inadequate skill training
					Personal experiences			Subsidies	Inadequate skill training
					Personal experiences			Subsidies	Inadequate skill training
					Personal experiences			Subsidies	Inadequate skill training
					Personal experiences			Subsidies	Inadequate skill training
					Personal experiences			Subsidies	Inadequate skill training
									Inadequate skill training
									Inadequate skill training
									Inadequate skill training
									Inadequate skill training
									Inadequate skill training
									Inadequate skill training
									Inadequate skill training
									Inadequate skill training
									Lack of access/rights to land
									Lack of access/rights to land
									Lack of access/rights to land
									Lack of access/rights to land
									Lack of access/rights to land
									Lack of access/rights to land
									Lack of access/rights to land
									Lack of access/rights to land
									Lack of access/rights to land
									Lack of access/rights to land
									Lack of access/rights to land
									Lack of access/rights to land
									Lack of access/rights to land
									Lack of access/rights to land
									Lack of access/rights to land
									Lack of access/rights to land
									Lack of access/rights to land
									Lack of access/rights to land
									Lack of access/rights to land
									Lack of access/rights to land
									Lack of control over irrigation facilities
									Lack of control over irrigation facilities
									Lack of control over irrigation facilities
									Lack of control over irrigation facilities
									Lack of control over irrigation facilities
									Lack of control over irrigation facilities
									Lack of control over irrigation facilities
									Lack of control over irrigation facilities
									Lack of control over irrigation facilities
									Lack of control over irrigation facilities
									Lack of control over irrigation facilities
									Lack of control over irrigation facilities
									Lack of control over irrigation facilities
									Poor access to the market
									Poor access to the market
									Poor access to the market
									Poor access to the market
									Poor access to the market
									Poor access to the market
									Poor access to the market
									Poor access to the market
									Poor access to the market
									Poor access to the market
									Poor access to the market
									Poor access to the market
									Poor access to the market
									Poor access to the market
									Poor access to the market
									Poor access to the market
									Poor access to the market
									Poor access to the market
									Poor access to the market
									Poor access to the market
Husband/Men/Male Farmers
Practising CSAT	CSAT knowledge level	Decision maker of CSAT adoption	Decisions to plant/rear livestock	Source of finance	Source of CSAT information	Ever receive extension training	Receiver of extension training	CSAT opportunities of male farmers	CSAT adoption barriers of male farmers
No	High	Husband and wife	Husband	Co-operative funds	Agriculture service providers/seed companies	No		Access to capital	Inadequate access to credit
Yes	Satisfactory	Only man/husband	Husband	Self-capital	Media	Yes	Husband	Subsidies	Inadequate access to credit
Yes	Satisfactory	Only man/husband	Husband	Self-capital	Media	Yes		Subsidies	Inadequate access to credit
Yes	Satisfactory	Only man/husband	Husband	Self-capital	Personal experiences	Yes		Subsidies	Inadequate access to credit
Yes	Satisfactory	Only man/husband	Husband	self-capital	Personal experiences	Yes		Subsidies	Inadequate access to credit
Yes	Satisfactory	Only man/husband	Husband	self-capital	Personal experiences	Yes		Subsidies	Inadequate access to credit
Yes	Satisfactory	Only man/husband	Husband	self-capital	Personal experiences	Yes		Subsidies	Inadequate access to credit
Yes	Satisfactory	Only man/husband	Husband	self-capital	Personal experiences	Yes		Subsidies	Inadequate access to credit
Yes	Satisfactory	Only man/husband	Husband	self-capital	Personal experiences	Yes		Subsidies	Inadequate access to credit
Yes	Satisfactory	Only man/husband	Husband	self-capital	Personal experiences	Yes		Subsidies	Inadequate access to credit
Yes	Satisfactory	Only man/husband	Husband	self-capital	Personal experiences	Yes		Subsidies	Inadequate access to credit
Yes	Satisfactory	Only man/husband	Husband	self-capital	Personal experiences	Yes		Subsidies	Inadequate access to credit
Yes	Satisfactory	Only man/husband	Husband	self-capital	Personal experiences	Yes		Subsidies	Inadequate access to credit
Yes	Satisfactory	Only man/husband	Husband	self-capital	Personal experiences	Yes		Subsidies	Inadequate access to credit
Yes	Satisfactory	Only man/husband	Husband	self-capital	Personal experiences	Yes		Subsidies	Inadequate access to credit
Yes	Satisfactory	Only man/husband	Husband	self-capital	Personal experiences	Yes		Subsidies	Inadequate access to credit
Yes	Satisfactory	Only man/husband	Husband	self-capital	Personal experiences	Yes		Subsidies	Inadequate access to credit
Yes	Satisfactory	Only man/husband	Husband	self-capital	Personal experiences	Yes		Subsidies	Inadequate access to credit
Yes	Satisfactory	Only man/husband	Husband	self-capital	Personal experiences	Yes		Subsidies	Inadequate access to credit
Yes	Satisfactory	Only man/husband	Husband	self-capital	Personal experiences	Yes		Subsidies	Inadequate access to credit
Yes	Satisfactory	Only man/husband	Husband	self-capital	Personal experiences	Yes		Subsidies	Inadequate access to credit
Yes	Satisfactory	Only man/husband	Husband	self-capital	Personal experiences	Yes		Subsidies	Inadequate access to credit
Yes	Satisfactory	Only man/husband	Husband	Self-capital	Personal experiences	Yes		Subsidies	Inadequate access to credit
Yes	Satisfactory	Only man/husband	Husband	Self-capital	Personal experiences	Yes		Subsidies	Inadequate access to credit
Yes	Satisfactory	Only man/husband	Husband	Self-capital	Personal experiences	Yes		Subsidies	Inadequate access to credit
Yes	Satisfactory	Only man/husband	Husband	Self-capital	Personal experiences	Yes		Subsidies	Inadequate access to credit
Yes	Satisfactory	Only man/husband	Husband and wife	Self-capital	Personal experiences	Yes		Subsidies	Inadequate access to credit
Yes	Satisfactory	Only man/husband	Husband and wife	Self-capital	Personal experiences	Yes		Subsidies	Inadequate access to credit
Yes	Satisfactory	Only man/husband	Husband and wife	Self-capital	Personal experiences	Yes		Subsidies	Inadequate access to credit
Yes	Satisfactory	Only man/husband	Husband and wife	Self-capital	Personal experiences	Yes		Subsidies	Inadequate access to credit
No idea	High	Husband and wife	Husband	Co-operative funds	Demonstration sites	No	Husband	Access to capital	Inadequate CSAT information
No idea	High	Husband and wife	Husband	Co-operative funds	Demonstration sites	No	Husband	Access to capital	Inadequate CSAT information
No idea	High	Husband and wife	Husband	Family	Demonstration sites	No	Husband	Access to capital	Inadequate CSAT information
No idea	High	Husband and wife	Husband	Family	Demonstration sites	No	Husband	Access to capital	Inadequate CSAT information
No idea	High	Husband and wife	Husband	Family	Demonstration sites	No	Husband	Access to capital	Inadequate CSAT information
No idea	High	Husband and wife	Husband	Family	Demonstration sites	No	Husband	Access to capital	Inadequate CSAT information
No idea	High	Husband and wife	Husband	Family	Demonstration sites	No	Husband	Access to capital	Inadequate CSAT information
No idea	High	Husband and wife	Husband	Family	Demonstration sites	No	Husband	Access to capital	Inadequate CSAT information
No idea	High	Husband and wife	Husband	Family	Demonstration sites	No	Husband	Access to capital	Inadequate CSAT information
Yes	High	Husband and wife	Husband	Family	Demonstration sites	No	Husband	Access to capital	Inadequate CSAT information
Yes	High	Husband and wife	Husband	Family	Demonstration sites	No	Husband	Access to capital	Inadequate CSAT information
Yes	High	Husband and wife	Husband	Family	Demonstration sites	No	Husband	Access to capital	Inadequate CSAT information
Yes	High	Only man/husband	Husband	Family	Demonstration sites	No	Husband	Access to capital	Inadequate CSAT information
Yes	High	Only man/husband	Husband	Family	Family members/Friends/neighbours	No	Husband	Access to capital	Inadequate CSAT information
Yes	High	Only man/husband	Husband	Family	Family members/Friends/neighbours	No	Husband	Access to capital	Inadequate CSAT information
Yes	High	Only man/husband	Husband	Family	Family members/Friends/neighbours	No	Husband	Access to capital	Inadequate CSAT information
Yes	High	Only man/husband	Husband	Family	Family members/Friends/neighbours	No	Husband	Access to capital	Inadequate CSAT information
Yes	High	Only man/husband	Husband	Family	Family members/Friends/neighbours	No	Husband	Access to capital	Inadequate CSAT information
Yes	High	Only man/husband	Husband	Family	Family members/Friends/neighbours	No	Husband	Access to capital	Inadequate CSAT information
Yes	High	Only man/husband	Husband	Family	Family members/Friends/neighbours	No	Husband	Access to capital	Inadequate CSAT information
Yes	High	Only man/husband	Husband	Family	Family members/Friends/neighbours	No	Husband	Access to capital	Inadequate CSAT information
Yes	High	Only man/husband	Husband	Family	Family members/Friends/neighbours	No	Husband	Access to capital	Inadequate CSAT information
Yes	High	Only man/husband	Husband	Family	Family members/Friends/neighbours	No	Husband	Access to capital	Inadequate CSAT information
Yes	High	Only man/husband	Husband	Family	Family members/Friends/neighbours	No	Husband	Access to capital	Inadequate CSAT information
Yes	High	Only man/husband	Husband	Family	Family members/Friends/neighbours	No	Husband	Access to capital	Inadequate CSAT information
Yes	High	Only man/husband	Husband	Family	Family members/Friends/neighbours	No	Husband	Access to capital	Inadequate CSAT information
Yes	High	Only man/husband	Husband	Family	Family members/Friends/neighbours	No	Husband	Access to capital	Inadequate CSAT information
Yes	High	Only man/husband	Husband	Family	Family members/Friends/neighbours	No	Husband	Access to capital	Inadequate CSAT information
Yes	High	Only man/husband	Husband	Family	Family members/Friends/neighbours	No	Husband	Access to capital	Inadequate CSAT information
Yes	High	Only man/husband	Husband	NGO	Family members/Friends/neighbours	No	Husband	Access to capital	Inadequate CSAT information
Yes	High	Only man/husband	Husband	NGO	Family members/Friends/neighbours	No	Husband	Access to capital	Inadequate CSAT information
Yes	High	Only man/husband	Husband	NGO	Family members/Friends/neighbours	No	Husband	Access to capital	Inadequate CSAT information
Yes	High	Only man/husband	Husband	Self-capital	Family members/Friends/neighbours	No	Husband	Access to capital	Inadequate CSAT information
Yes	High	Only man/husband	Husband	Self-capital	Family members/Friends/neighbours	No	Husband	Access to capital	Inadequate CSAT information
Yes	High	Only man/husband	Husband	Self-capital	Family members/Friends/neighbours	No	Husband	Access to capital	Inadequate CSAT information
Yes	High	Only man/husband	Husband	Self-capital	Family members/Friends/neighbours	No	Husband	Access to capital	Inadequate CSAT information
Yes	High	Only man/husband	Husband	Self-capital	Family members/Friends/neighbours	No	Husband	Access to capital	Inadequate CSAT information
Yes	High	Only man/husband	Husband	Self-capital	Family members/Friends/neighbours	No	Husband	Access to capital	Inadequate skill training
Yes	High	Only man/husband	Husband	Self-capital	Family members/Friends/neighbours	No	Husband	Access to capital	Inadequate skill training
Yes	High	Only man/husband	Husband	Self-capital	Family members/Friends/neighbours	No	Husband	Access to capital	Inadequate skill training
Yes	Low	Only man/husband	Husband	Self-capital	Family members/Friends/neighbours	No	Husband	Access to capital	Inadequate skill training
Yes	low	Only man/husband	Husband	Self-capital	Family members/Friends/neighbours	No	Husband	Access to capital	Inadequate skill training
Yes	low	Only man/husband	Husband	Self-capital	Family members/Friends/neighbours	No	Husband	Access to capital	Inadequate skill training
Yes	low	Only man/husband	Husband	Self-capital	Family members/Friends/neighbours	No	Husband	Access to capital	Inadequate skill training
Yes	low	Only man/husband	Husband	Self-capital	Family members/Friends/neighbours	No	Husband	Access to capital	Inadequate skill training
Yes	low	Only man/husband	Husband	Self-capital	Family members/Friends/neighbours	No	Husband	Access to capital	Inadequate skill training
Yes	low	Only man/husband	Husband	Self-capital	Family members/Friends/neighbours	No	Husband	Access to capital	Inadequate skill training
Yes	low	Only man/husband	Husband	Self-capital	Family members/Friends/neighbours	No	Husband	Access to capital	Inadequate skill training
Yes	low	Only man/husband	Husband	Self-capital	Family members/Friends/neighbours	No	Husband	Access to capital	Inadequate skill training
Yes	low	Only man/husband	Husband	Self-capital	Family members/Friends/neighbours	No	Husband	Access to capital	Inadequate skill training
Yes	low	Only man/husband	Husband	Self-capital	Family members/Friends/neighbours	No	Husband	Access to capital	Inadequate skill training
Yes	low	Only man/husband	Husband	Self-capital	Family members/Friends/neighbours	No	Husband	Access to capital	Inadequate skill training
Yes	low	Only man/husband	Husband	Self-capital	Family members/Friends/neighbours	No	Husband	Access to capital	Inadequate skill training
Yes	low	Only man/husband	Husband	Self-capital	Family members/Friends/neighbours	No	Husband	Access to capital	Inadequate skill training
Yes	low	Only man/husband	Husband	Self-capital	Family members/Friends/neighbours	No	Husband	Access to capital	Inadequate skill training
Yes	low	Only man/husband	Husband	Self-capital	Family members/Friends/neighbours	Yes	Husband	Access to credit	Inadequate skill training
Yes	Satisfactory	Only man/husband	Husband	Self-capital	Family members/Friends/neighbours	Yes	Husband	Access to credit	Inadequate skill training
Yes	Satisfactory	Only man/husband	Husband	Self-capital	Family members/Friends/neighbours	Yes	Husband	Access to input market	Inadequate skill training
Yes	Satisfactory	Only man/husband	Husband	Self-capital	Family members/Friends/neighbours	Yes	Husband	Access to input market	Inadequate skill training
Yes	Satisfactory	Only man/husband	Husband	Self-capital	Family members/Friends/neighbours	Yes	Husband	Access to input market	Inadequate skill training
Yes	Satisfactory	Only man/husband	Husband	Self-capital	Family members/Friends/neighbours	Yes	Husband	Access to input market	Inadequate skill training
Yes	Satisfactory	Only man/husband	Husband	Self-capital	Family members/Friends/neighbours	Yes	Husband	Access to input market	Inadequate skill training
Yes	Satisfactory	Only man/husband	Husband	Self-capital	Family members/Friends/neighbours	Yes	Husband	Access to input market	Inadequate skill training
Yes	Satisfactory	Only man/husband	Husband	Self-capital	Family members/Friends/neighbours	Yes	Husband	Access to input market	Inadequate skill training
Yes	Satisfactory	Only man/husband	Husband	Self-capital	Farmers' cooperatives	Yes	Husband	Access to input market	Lack of access/rights to land
Yes	Satisfactory	Only man/husband	Husband	Self-capital	Farmers' cooperatives	Yes	Husband and wife	Access to input market	Lack of access/rights to land
Yes	Satisfactory	Only man/husband	Husband	Self-capital	Farmers' cooperatives	Yes	Husband and wife	Access to input market	Lack of access/rights to land
Yes	Satisfactory	Only man/husband	Husband	Self-capital	Government extension services	Yes		Access to input market	Lack of access/rights to land
Yes	Satisfactory	Only man/husband	Husband	Self-capital	Government extension services	Yes		Access to input market	Lack of access/rights to land
Yes	Satisfactory	Only man/husband	Husband	Self-capital	Government extension services	Yes		Access to input market	Lack of access/rights to land
Yes	Satisfactory	Only man/husband	Husband	Self-capital	Government extension services	Yes		Access to input market	Lack of access/rights to land
Yes	Satisfactory	Only man/husband	Husband	Self-capital	Media	Yes		Access to input market	Lack of access/rights to land
Yes	Satisfactory	Only man/husband	Husband	Self-capital	Media	Yes		Access to input market	Lack of access/rights to land
Yes	Satisfactory	Only man/husband	Husband	Self-capital	Media	Yes		Access to input market	Lack of access/rights to land
Yes	Satisfactory	Only man/husband	Husband	Self-capital	Media	Yes		Subsidies	Lack of access/rights to land
Yes	Very high	Only man/husband	Husband and wife	Self-capital	Personal experiences	Yes		Subsidies	Lack of control over irrigation facilities
Yes	Very high	Only man/husband	Husband and wife	Self-capital	Personal experiences	Yes		Subsidies	Lack of control over irrigation facilities
Yes	Very high	Only man/husband	Husband and wife	Self-capital	Personal experiences	Yes		Subsidies	Lack of control over irrigation facilities
Yes	Very high	Only man/husband	Husband and wife	Self-capital	Personal experiences	Yes		Subsidies	Lack of control over irrigation facilities
					Personal experiences			Subsidies	Lack of control over irrigation facilities
					Personal experiences			Subsidies	Lack of control over irrigation facilities
					Personal experiences			Subsidies	Lack of control over irrigation facilities
					Personal experiences			Subsidies	Lack of control over irrigation facilities
					Personal experiences			Subsidies	Lack of control over irrigation facilities
					Personal experiences			Subsidies	Lack of control over irrigation facilities
								Subsidies	Lack of control over irrigation facilities
